# Supplementary material
Source: Springer Nature journal article supplement (https://www.springermedizin.de/resource/supplementary/12879_2012_2061_MOESM2_ESM.pdf/9443314)

### Control Culture

(A)

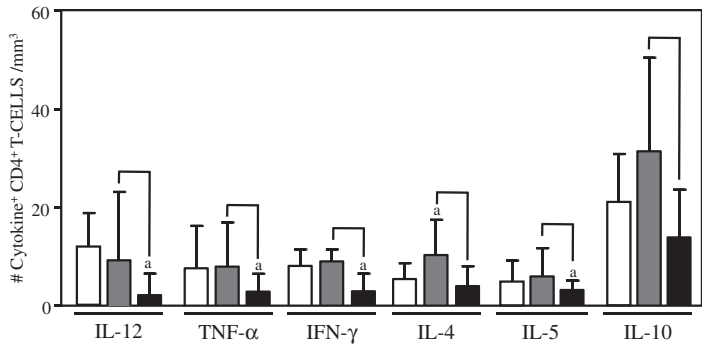

### Stimulated Culture

(B)

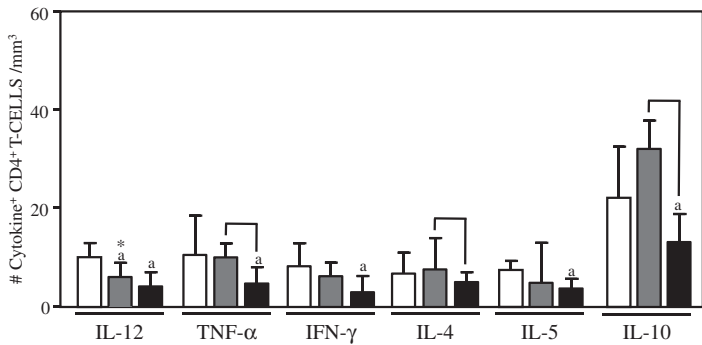

Supplement: MOESM2 [file 9443314]
